# Supplementary material for: The Fabaceae in northeastern Mexico II (Subfamilies Caesalpinioideae, Cercidoideae, and Detarioideae)
Source: Preprints.org preprint supplement (doi:10.20944/preprints202404.0408.v1), 2024-04-05
Supplement: Supplementary file 1 [file supplementary]

## Sheet: Hoja1
S1, Supplementary material. Species of the subfamilies Caesalpinioideae, Cercidoideae and Detariodeae in northeastern and other areas in Mexico.
	Zimatán, Oaxaca	NE México	Tabasco	Q. Roo	Chamela	Chiapas	Yucatán	Durango	Des. Sonorense	Texas	Novo Galicia	Valle México	El Bajìo
Acrocarpus fraxinifolius	0	0	0	0	0	1	0	0	0	0	0	0	0
Bauhinia bartlettii	0	1	0	0	0	0	0	0	0	0	0	0	0
Bauhinia chapulhuacania	0	0	0	0	0	0	0	0	0	0	0	0	1
Bauhinia cookii	1	0	0	0	0	1	0	0	0	0	1	0	0
Bauhinia coulteri	0	1	0	0	0	0	0	0	0	0	0	0	1
Bauhinia dipetala	0	0	0	0	0	1	0	0	0	0	0	0	0
Bauhinia divaricata	1	1	1	1	1	1	1	0	0	0	1	0	1
Bauhinia erythrocalyx	0	0	0	1	0	1	1	0	0	0	0	0	0
Bauhinia glabra	0	0	0	0	0	0	0	0	0	0	0	0	0
Bauhinia gypsicola	0	0	0	0	0	0	0	0	0	0	1	0	0
Bauhinia herrerae	0	0	1	1	0	1	1	0	0	0	0	0	0
Bauhinia jenningsii	0	0	0	1	0	0	1	0	0	0	0	0	0
Bauhinia lunarioides	0	1	0	0	0	0	0	0	0	0	0	0	0
Bauhinia macranthera	0	1	0	0	0	0	0	0	0	0	0	0	1
Bauhinia microstachya	0	0	0	0	0	1	0	0	0	0	0	0	0
Bauhinia monandra	0	0	1	0	0	0	0	0	0	0	0	0	0
Bauhinia pansamalana	0	0	0	0	0	1	0	0	0	0	0	0	0
Bauhinia pauletia	0	0	0	0	1	1	0	0	0	0	1	0	0
Bauhinia peninsukaris	0	0	0	0	0	0	0	0	1	0	0	0	0
Bauhinia pringlei	0	0	0	0	0	0	0	0	0	0	1	0	0
Bauhinia ramosissima var. ramosissima	0	1	0	0	0	0	0	0	0	0	0	0	1
Bauhinia ramosissima var. uniflora	0	1	0	0	0	0	0	0	0	0	0	0	0
Bauhinia rubeleruziana	0	0	0	0	0	1	0	0	0	0	0	0	0
Bauhinia seleriana	0	0	0	0	0	1	0	0	0	0	0	0	0
Bauhinia subrotundifolia	1	0	0	0	1	0	0	0	0	0	1	0	0
Bauhinia ungulata	1	0	1	1	1	1	1	0	0	0	1	0	0
Bauhinia variegata var. variegata	0	1	1	1	0	0	0	0	0	0	1	0	0
Bauhinia variegata var. candida	1	1	1	1	1	1	1	1	1	1	1	1	1
Caesalpinia pulcherrima	1	1	1	1	1	1	0	1	1	0	1	0	1
Cassia fistula	0	1	1	1	0	0	0	0	0	0	1	0	0
Cassia grandis	0	0	1	1	0	1	0	0	0	0	1	0	0
Cassia hintonii	0	0	0	0	1	0	0	0	0	0	1	0	0
Cassia javanica	0	0	0	0	0	1	0	0	0	0	0	0	0
Cassia leiandra	0	0	0	0	0	1	0	0	0	0	0	0	0
Cenostigma eriostachys	1	0	0	0	1	1	0	1	0	0	1	0	0
Cenostigma gaumeri	0	0	1	1	0	0	1	0	0	0	0	0	0
Ceratonia siliqua	0	1	0	0	0	0	0	0	0	0	0	0	0
Cercis candensis	0	1	0	0	0	0	0	0	0	0	0	0	1
Chamaecrista chamaecristoides	0	0	1	0	0	0	0	0	0	0	0	0	0
Chamaecrista aristellata	0	0	0	0	0	0	0	0	0	1	0	0	0
Chamaecrista chamaecristoides chamaec.	0	1	0	0	0	0	0	0	0	0	1	0	0
Chamaecrista chamaecristoides var. cruziana	0	1	0	0	0	0	0	0	0	0	0	0	0
Chamaecrista desvauxii	0	0	1	0	0	0	0	0	0	0	1	0	0
Chamaecrista diphylla	0	0	1	0	0	1	0	0	0	0	0	0	0
Chamaecrista fagifolia	0	0	1	0	0	0	0	0	0	0	0	0	0
Chamaecrista fagonioides	0	0	1	0	0	1	0	0	0	0	0	0	0
Chamaecrista fagonoides fagonoides	0	0	1	0	0	0	0	0	0	0	0	0	0
Chamaecrista fasciculata	0	0	0	0	0	0	0	0	0	1	0	0	0
Chamaecrista flexousa var. texana	0	0	0	0	0	0	0	0	0	1	0	0	0
Chamaecrista flexuosa	1	1	1	0	0	1	0	0	0	0	1	0	0
Chamaecrista glandulosa var. flavicoma	0	0	0	1	0	0	0	0	0	0	1	0	0
Chamaecrista glandulosa var. parralensis	0	0	0	0	0	0	0	1	0	0	1	0	1
Chamaecrista greggii var. potosina	0	1	0	0	0	0	0	0	0	0	0	0	1
Chamaecrista greggii var. greggii	0	1	0	0	0	0	0	0	0	1	0	0	0
Chamaecrista hispidula	1	0	1	0	0	1	0	1	0	0	1	0	0
Chamaecrista kunthiana	0	0	1	0	1	1	0	0	0	0	0	0	0
Chamaecrista leptadenia	0	0	0	0	0	0	0	0	1	1	0	0	0
Chamaecrista nictitans L. var. jaliscensis	1	0	1	1	0	1	0	0	0	0	0	0	1
Chamaecrista nictitans ssp. disadena	0	1	0	0	0	1	0	0	0	1	1	0	1
Chamaecrista nictitans ssp. patellaria	0	0	0	0	0	1	0	0	0	0	0	0	0
Chamaecrista nictitans var. glabrata	0	0	1	0	0	1	0	0	0	0	0	0	0
Chamaecrista nictitans var. racemosa	0	0	1	0	0	0	0	0	0	0	0	0	0
Chamaecrista pilosa	0	0	0	0	0	1	0	0	0	0	1	0	0
Chamaecrista punctulata	0	0	0	0	0	0	0	1	0	0	1	0	0
Chamaecrista rotundifolia	1	0	0	0	0	0	0	1	0	0	1	0	1
Chamaecrista rufa	0	1	0	0	0	1	0	0	0	0	0	0	1
Chamaecrista serpens var. wrightii	0	0	1	0	0	1	0	1	0	0	1	0	0
Chamaecrsita absus	0	0	0	0	0	0	0	0	0	0	1	0	0
Chamaecrsita viscosa	0	0	0	0	0	0	0	0	0	0	1	0	0
Chamecrista wrightii	0	0	0	0	0	0	0	0	1	0	0	0	0
Conzattia chiapensis	0	0	0	0	0	1	0	0	0	0	0	0	0
Conzattia multiflora	0	1	0	0	0	0	0	0	0	0	1	0	1
Conzattia sericea	0	0	0	0	1	0	0	1	0	0	0	0	0
Coulteria cubensis	0	0	0	1	0	1	0	0	0	0	0	0	0
Coulteria glabra	0	0	0	0	0	0	0	0	0	0	1	0	0
Coulteria mollis	0	0	0	0	0	0	1	0	0	0	0	0	0
Coulteria platyloba	1	0	0	0	1	0	0	1	1	0	1	0	0
Coulteria pringlei	0	0	0	0	0	0	0	0	0	0	0	0	1
Coulteria pringlei	0	1	0	0	0	0	0	0	0	0	0	0	0
Coulteria pumila	0	0	0	0	0	0	0	0	1	0	0	0	0
Coulteria velutina	1	0	0	0	0	1	0	0	0	0	0	0	0
Cynometra oaxacana	0	0	0	0	1	1	0	0	0	0	1	0	0
Cynometra retusa	0	0	1	0	0	1	1	0	0	0	0	0	0
Delonix regia	0	1	1	0	0	1	0	0	0	0	1	0	0
Denisophytum sessilifolium	0	0	0	0	0	0	0	1	0	0	0	0	0
Denisophytum sessilifolium	0	1	0	0	0	0	0	0	0	0	0	0	0
Dialum guianense	0	0	1	0	0	1	1	0	0	0	0	0	0
Erythrostemnon gilliesii	0	0	0	0	0	0	0	1	1	1	0	0	0
Erythrostemon caladenia	0	0	0	0	1	0	0	0	1	0	1	0	0
Erythrostemon caudatus	0	1	0	0	0	0	0	0	0	1	0	0	0
Erythrostemon coccineus	1	0	0	0	0	0	0	0	0	0	0	0	0
Erythrostemon exostemma ssp. tampicoanus	1	1	0	0	0	1	0	0	0	0	1	0	0
Erythrostemon gilliesii	0	1	0	0	0	0	0	0	0	1	0	0	0
Erythrostemon laxus	0	0	0	0	0	0	0	0	0	0	1	0	0
Erythrostemon mexicanus	0	1	0	0	0	0	0	0	0	1	1	0	1
Erythrostemon palmeri	0	0	0	0	0	0	0	0	1	0	0	0	0
Erythrostemon pannosus	0	0	0	0	0	0	0	0	1	0	0	0	0
Erythrostemon phyllanthoides	0	1	0	0	0	0	0	0	0	1	0	0	0
Erythrostemon placidus	0	0	0	0	0	0	0	0	1	0	0	0	0
Erythrostemon yucatanensis	0	0	1	1	0	1	1	0	0	0	0	0	0
Gleditsia aquatica	0	0	0	0	0	0	0	0	0	1	0	0	0
Gleditsia triacanthos	0	1	0	0	0	0	0	0	0	1	0	0	0
Guilandina bonduc	0	1	0	0	0	0	0	0	0	0	0	0	0
Guilandina major	0	0	0	0	0	1	0	0	0	0	0	0	0
Guillandina bonduc	0	0	0	1	0	1	1	0	0	0	1	0	0
Gymnocladus dioica	0	0	0	0	0	0	0	0	0	1	0	0	0
Haematoxylon brasiletto	1	1	1	0	1	1	0	1	1	0	1	0	0
Haematoxylon campechianum	0	0	0	1	0	1	1	0	0	0	0	0	0
Hematoxylum calakmulense	0	0	0	0	0	0	1	0	0	0	0	0	0
Hoffamannseggia oxycarpa ssp. oxycarpa	0	1	0	0	0	0	0	0	0	1	0	0	0
Hoffmannseggia drummondii	0	1	0	0	0	0	0	0	0	1	0	0	0
Hoffmannseggia glauca	0	0	0	0	0	0	0	0	1	0	0	0	0
Hoffmannseggia glauca	0	0	0	0	0	0	0	1	0	0	0	0	0
Hoffmannseggia glauca	0	1	0	0	0	0	0	0	0	1	0	0	1
Hoffmannseggia humilis	0	1	0	0	0	0	0	0	0	0	0	0	1
Hoffmannseggia intricata	0	0	0	0	0	0	0	0	1	0	0	0	0
Hoffmannseggia microphylla	0	0	0	0	0	0	0	0	1	0	0	0	0
Hoffmannseggia oxycarpa ssp.arida	0	0	0	0	0	0	0	0	0	0	0	0	1
Hoffmannseggia peninsularis	0	0	0	0	0	0	0	0	1	0	0	0	0
Hoffmannseggia tenella	0	0	0	0	0	0	0	0	0	1	0	0	0
Hoffmannseggia watsoni	0	1	0	0	0	0	0	0	0	0	0	0	1
Hoffmansneggia drepanocarpa	0	0	0	0	0	0	0	0	1	1	0	0	0
Hoffmansseggia drummondii	0	0	0	0	0	0	0	0	0	1	0	0	0
Hymenaea coubaril	0	0	1	0	0	1	0	0	0	0	1	0	0
Libidibia coriaria	1	0	0	0	1	0	0	0	0	0	1	0	0
Libidibia sclerocarpa	1	0	0	0	1	0	0	1	0	0	1	0	0
Parkinsonia aculeata	0	1	0	1	0	1	0	1	1	1	1	0	1
Parkinsonia florida	0	0	0	0	0	0	0	0	1	0	0	0	0
Parkinsonia florida ssp. peninsulare	0	0	0	0	0	0	0	0	1	0	0	0	0
Parkinsonia microphylla	0	0	0	0	0	0	0	0	1	0	0	0	0
Parkinsonia praecox	0	0	0	0	0	1	0	1	1	0	1	0	0
Parkinsonia sonorae	0	0	0	0	0	0	0	0	1	0	0	0	0
Parkinsonia texana var. macra	0	1	0	0	0	0	0	1	0	1	0	0	0
Parkinsonia texana var. texana	0	1	0	0	0	0	0	0	0	1	0	0	0
Poeppigia procera	1	0	0	0	1	1	0	0	0	0	1	0	0
Pomaria austrotexana	0	1	0	0	0	0	0	0	0	0	0	0	0
Pomaria brachycarpa	0	0	0	0	0	0	0	0	0	1	0	0	0
Pomaria canescens	0	1	0	0	0	0	0	0	0	0	0	0	0
Pomaria fruticosa	0	1	0	0	0	0	0	0	0	0	0	0	0
Pomaria glandulosa	0	0	0	0	0	0	0	0	0	0	1	0	0
Pomaria glandulosa	0	0	0	0	0	0	0	0	0	0	0	0	1
Pomaria jamessii	0	1	0	0	0	0	0	1	0	1	0	0	0
Pomaria melanosticta	0	0	0	0	0	0	0	1	0	0	0	0	0
Pomaria melanosticta	0	1	0	0	0	0	0	0	0	0	0	0	1
Pomaria wootonii	0	1	0	0	0	0	0	0	0	0	0	0	0
Senna alata	1	1	1	1	0	0	0	0	0	1	1	0	0
Senna arida	0	0	0	0	0	0	0	0	0	0	1	0	1
Senna armata	0	0	0	0	0	0	0	0	1	0	0	0	0
Senna atomaria	1	1	1	1	1	0	1	0	0	0	1	0	1
Senna bacillaris	0	0	1	0	0	0	0	0	0	0	0	0	0
Senna bauhinioides	0	1	0	0	0	0	0	0	1	1	0	0	0
Senna bicapsularis	0	0	0	0	1	0	1	0	0	0	0	0	0
Senna candolleana	0	0	0	0	0	0	0	0	1	0	0	0	0
Senna centranthera	0	0	0	0	0	0	0	0	0	0	1	0	0
Senna cobanensis	1	0	1	0	0	1	1	0	0	0	1	0	0
Senna confinis	0	0	0	0	0	0	0	0	1	0	0	0	0
Senna covesii	0	0	0	0	0	0	0	0	1	0	0	0	0
Senna corymbosa	0	0	0	0	0	0	0	1	0	1	0	0	0
Senna crotalarioides	0	1	0	0	0	0	0	1	0	0	1	0	1
Senna demissa demissa	0	1	0	0	0	0	0	0	0	0	0	0	1
Senna demissa radicans	0	1	0	0	0	0	0	0	0	0	0	0	0
Senna didymobotrya	0	0	0	0	0	1	0	0	0	0	1	0	0
Senna durangensis	0	0	0	0	0	0	0	1	0	1	0	0	0
Senna foetidissima var. grandiflora	0	1	0	0	0	1	0	0	0	0	1	0	1
Senna fruticosa	0	0	1	0	1	1	1	1	0	0	1	0	0
Senna guatemalensis	0	0	1	0	0	0	0	0	0	0	0	0	0
Senna guatemalensis var. calcarea	0	1	0	0	0	0	0	0	0	0	0	0	0
Senna guatemalensis var. chiapensis	0	0	0	0	0	1	0	0	0	0	0	0	0
Senna guatemalensis var. hidalgensis	0	0	0	0	0	0	0	0	0	0	0	0	1
Senna hayesiana	0	0	1	1	0	1	1	0	0	0	0	0	0
Senna hirsuta	1	0	0	1	0	0	1	1	0	0	1	0	1
Senna hirsuta var. glaberima	0	0	0	0	0	0	0	0	1	0	0	0	0
Senna holwayana	1	0	0	0	0	1	0	0	0	0	0	0	0
Senna koelziana	0	0	0	0	0	0	0	0	0	0	1	0	0
Senna lindheimeriana	0	1	0	0	0	0	0	1	0	1	0	0	0
Senna marilandica	0	0	0	0	0	0	0	0	0	1	0	0	0
Senna mensicola	0	1	0	0	0	0	0	0	0	0	0	0	1
Senna mollissima var. glabrata	0	0	0	0	1	0	0	0	0	0	1	0	0
Senna monozyx	0	1	0	0	0	0	0	0	0	0	0	0	0
Senna multifoliolata	0	0	0	0	0	0	0	0	0	0	1	0	0
Senna multiglandulosa	0	0	0	0	0	1	0	0	0	0	1	1	1
Senna multijuga ssp. doylei	0	0	1	0	0	1	0	0	0	0	0	0	0
Senna nicaraguensis	1	0	0	0	1	1	0	0	0	0	1	0	0
Senna obtusifolia	1	1	1	0	1	1	1	0	0	1	1	0	1
Senna occidentalis	1	1	1	1	1	1	1	0	0	1	1	0	0
Senna orcuttii	0	1	0	0	0	0	0	0	0	0	0	0	0
Senna pallida (Vahl) I. & B. var. quiedondilla	0	0	0	0	0	1	0	0	0	0	0	0	0
Senna pallida var. brachyrrhachis	0	0	0	0	0	1	0	0	0	0	0	0	0
Senna pallida var. delgadoana	0	0	0	0	0	1	0	0	0	0	0	0	0
Senna pallida var. gaumeri	0	0	0	1	0	0	1	0	0	0	0	0	0
Senna pallida var. goldmaniana	0	0	0	1	0	0	1	0	0	0	0	0	0
Senna pallida var. isthmica	0	0	0	0	0	1	0	0	0	0	0	0	0
Senna pallida var. pallida	1	0	0	0	0	0	0	0	1	0	0	0	0
Senna pallida var. pallida	0	0	0	0	0	1	0	0	0	0	1	0	1
Senna pallida vr. Geminfilora	0	0	0	0	0	0	0	0	0	0	1	0	0
Senna papillosa	0	0	1	0	0	1	1	0	0	0	0	0	0
Senna pendula	1	1	1	0	0	1	1	0	0	0	1	0	1
Senna pendula var. advena	0	0	1	0	0	1	0	0	0	0	1	0	0
Senna pendula var. pendula	0	0	1	0	0	0	0	0	0	0	0	0	0
Senna pentagonia var. pentagonia	0	0	0	0	0	1	1	0	0	0	0	0	0
Senna peralteana	0	0	1	0	0	0	0	0	0	0	0	0	0
Senna peralteana	0	0	0	1	0	1	1	0	0	0	0	0	0
Senna pilifera	0	0	0	0	0	1	0	1	0	0	1	0	0
Senna pilosior	0	1	0	0	0	0	0	0	0	0	0	0	0
Senna polyantha	0	0	0	0	0	0	0	0	1	0	0	0	0
Senna polyantha	0	0	0	0	0	0	0	0	0	0	1	0	1
Senna polyphylla var. polyphylla	0	0	0	0	0	0	1	0	0	0	0	0	0
Senna pumilio	0	1	0	0	0	0	0	1	0	1	0	0	0
Senna purpusii	0	0	0	0	0	0	0	0	1	0	0	0	0
Senna quinquangulata	0	0	0	0	0	0	1	1	0	0	1	0	0
Senna racemosa	0	0	0	1	0	0	0	0	0	0	1	0	1
Senna racemosa var. liebmannii	0	0	0	0	0	1	1	0	0	0	0	0	0
Senna reticulata	1	0	1	0	0	1	1	0	0	0	0	0	0
Senna ripleyana	0	1	0	0	0	0	0	0	0	0	0	0	0
Senna roemeriana	0	1	0	0	0	0	0	0	1	1	0	0	0
Senna rotundifolia	0	0	1	0	0	0	0	0	0	0	0	0	0
Senna septentrionalis	0	1	0	0	0	1	0	1	0	0	1	1	1
Senna serpens	1	0	0	0	0	0	0	0	0	0	0	0	0
Senna siamea	0	0	1	1	0	0	0	0	0	0	0	0	0
Senna skinneri	1	0	0	0	0	1	0	0	0	0	1	0	0
Senna spectabilis	0	0	1	0	0	1	0	0	0	0	0	0	0
Senna stenocarpa	0	0	1	0	0	0	0	0	0	0	0	0	0
Senna talpana	0	0	0	0	0	0	0	0	0	0	1	0	0
Senna tonduzii	0	0	0	0	0	1	0	0	0	0	0	0	0
Senna undulata	0	0	1	1	0	1	1	0	0	0	0	0	0
Senna uniflora	1	0	0	0	0	0	0	0	1	0	0	0	0
Senna uniflora	0	1	0	1	1	1	1	0	1	0	1	0	1
Senna villosa	0	0	0	1	0	1	1	0	0	0	0	0	0
Senna wislizeni var. painteri	0	1	0	0	0	0	0	0	0	0	0	0	1
Senna wislizeni var. villosa	0	1	0	0	0	0	0	0	0	0	0	0	0
Senna wislizenii	0	1	0	0	0	0	0	1	1	1	1	0	0
Tamarindus indica	1	1	1	1	0	1	0	0	1	0	1	0	0
Tara cacalaco	1	0	0	0	0	1	0	0	0	0	1	1	0
Tara vesicaria	0	0	0	1	0	1	1	0	0	0	0	0	0
Ticanto crista	0	0	1	0	0	0	0	0	0	0	0	0	0
